# Supplementary material for: Differences in Prognostic Factors among Patients Hospitalized for Heart Failure According to the Age Category: From the KUNIUMI Registry Acute Cohort
Source: PubMed Central journal article supplement — Intern Med. 2022 Nov 1;61(21):3171–80. doi: 10.2169/internalmedicine.9023-21 (PMC9683819; doi:10.2169/internalmedicine.9023-21), 2022-11-01
Supplement: 1349-7235-61-3171-s001.pdf [file 1349-7235-61-3171-s001.pdf]

**Supplemental table 1.** A comparison of prescribed anticoagulants among patients with AF

|                                 | <b>≤65 years</b><br><b>(N=43)</b> | <b>66–75 years</b><br><b>(N=102)</b> | <b>76–85 years</b><br><b>(N=215)</b> | <b>&gt;85 years</b><br><b>(N=230)</b> | <b>p-value</b> |
|---------------------------------|-----------------------------------|--------------------------------------|--------------------------------------|---------------------------------------|----------------|
| <b>Any anticoagulant, n (%)</b> | 35 (81.4)                         | 88 (86.3)                            | 171 (79.5)                           | 159 (69.1)                            | 0.003          |
| <b>Warfarin, n (%)</b>          | 15 (34.9)                         | 48 (47.1)                            | 90 (41.9)                            | 78 (33.9)                             | 0.10           |
| <b>DOAC, n (%)</b>              | 20 (46.5)                         | 40 (39.2)                            | 81 (37.7)                            | 81 (35.2)                             | 0.55           |
| <b>Type of DOAC</b>             |                                   |                                      |                                      |                                       | 0.044          |
| <b>Dabigatran, n (%)</b>        | 1 (5.0)                           | 2 (5.3)                              | 3 (3.8)                              | 0 (0.0)                               |                |
| <b>Rivaroxaban, n (%)</b>       | 5 (25.0)                          | 6 (15.8)                             | 9 (11.1)                             | 2 (2.5)                               |                |
| <b>Apixaban, n (%)</b>          | 7 (35.0)                          | 11 (28.9)                            | 32 (41.0)                            | 35 (43.2)                             |                |
| <b>Edoxaban, n (%)</b>          | 7 (35.0)                          | 21 (52.5)                            | 37 (45.7)                            | 44 (54.3)                             |                |
| <b>Low dose DOAC, n (%)</b>     | 1 (5.0)                           | 11 (27.5)                            | 13 (16.0)                            | 6 (7.4)                               | 0.014          |

Frequency count n (%) for categorical variables.

AF, atrial fibrillation; DOAC, direct oral anticoagulant
